# Supplementary material
Source: PubMed Central journal article supplement (PMC1169496)
Supplement: jbacter_187_14_4865__1.pdf [file jbacter_187_14_4865__1.pdf]

**Supplementary Table 1. Iron-repressible open reading frames of *Neisseria gonorrhoeae* FA1090.**

| Fold Change<br>(Fe-/Fe+) | Gene    | Product                                                    | Gene        | SignalP |
|--------------------------|---------|------------------------------------------------------------|-------------|---------|
| 4.46                     | NG0554  | hypothetical protein                                       |             | S       |
| 3.55                     | NG0574c | carbonic anhydrase                                         | <i>cah</i>  | S       |
| 3.37                     | NG1718  | putative virulence factor MviN protein                     | <i>mviN</i> | NS      |
| 3.20                     | NG0863c | conserved hypothetical protein                             |             | NS      |
| 2.67                     | NG1442  | putative alcohol dehydrogenase                             | <i>adhA</i> | NS      |
| 2.55                     | NG1174c | conserved hypothetical protein                             |             | NS      |
| 2.38                     | NG0186c | zinc-binding alcohol dehydrogenase                         |             | NS      |
| 2.28                     | NG0788  | genome-derived Neisseria antigen 1220 (GNA1220)            |             | S       |
| 2.27                     | NG0887c | conserved hypothetical protein                             |             | NS      |
| 2.25                     | NG0867c | conserved hypothetical protein                             |             | NS      |
| 2.23                     | NG0164c | conserved hypothetical protein                             |             | NS      |
| 2.12                     | NG0025  | AraC-family transcriptional regulator                      |             | NS      |
| 2.09                     | NG1358  | putative glutamate dehydrogenase                           |             | NS      |
| 2.08                     | NG0474c | hypothetical protein                                       |             | NS      |
| 2.01                     | NG1177c | conserved hypothetical protein                             |             | NS      |
| 2.00                     | NG0602  | MerR-family transcriptional regulator                      |             | NS      |
| 1.98                     | NG1141c | conserved hypothetical protein                             |             | NS      |
| 1.95                     | NG0142  | putative sugar transporter                                 |             | NS      |
| 1.95                     | NG1002c | hypothetical protein                                       |             | NS      |
| 1.95                     | NG1586  | conserved hypothetical protein                             |             | NS      |
| 1.93                     | NG0931  | 50S ribosomal protein L36                                  |             | NS      |
| 1.91                     | NG1085  | hypothetical protein                                       |             | NS      |
| 1.90                     | NG0600c | putative esterase D                                        |             | NS      |
| 1.87                     | NG1495c | transferrin-binding protein A                              | <i>tbpA</i> | S       |
| 1.86                     | NG0656  | putative membrane transporter                              |             | NS      |
| 1.86                     | NG2114c | aldehyde dehydrogenase A                                   | <i>aldA</i> | NS      |
| 1.84                     | NG0322  | conserved hypothetical protein                             |             | NS      |
| 1.83                     | NG1013c | repressor                                                  |             | NS      |
| 1.82                     | NG1139c | conserved hypothetical protein                             |             | NS      |
| 1.81                     | NG0208  | conserved hypothetical protein                             |             | NS      |
| 1.79                     | NG0467c | hypothetical protein                                       |             | NS      |
| 1.79                     | NG0495  | hypothetical protein                                       |             | NS      |
| 1.79                     | NG1173  | DNA mismatch endonuclease, patch repair                    | <i>vsr</i>  | NS      |
| 1.77                     | NG2115c | AraC-family transcriptional regulator                      |             | NS      |
| 1.76                     | NG0108  | conserved hypothetical protein                             |             | NS      |
| 1.76                     | NG0125  | hypothetical protein                                       |             | NS      |
| 1.76                     | NG0713c | 4-hydroxy-2-oxoglutarate aldolase                          | <i>eda</i>  | NS      |
| 1.75                     | NG0853  | conserved hypothetical protein                             |             | S       |
| 1.73                     | NG1063c | conserved hypothetical protein                             |             | S       |
| 1.73                     | NG2093c | ferric enterobactin receptor                               | <i>fetA</i> | S       |
| 1.72                     | NG1318c | conserved hypothetical protein                             |             | NS      |
| 1.71                     | NG1391c | hypothetical protein                                       |             | NS      |
| 1.70                     | NG1168c | conserved hypothetical protein                             |             | S       |
| 1.69                     | NG0385  | delta-aminolevulinic acid dehydratase                      | <i>hemB</i> | NS      |
| 1.69                     | NG0754  | molybdopterin-guanine dinucleotide                         |             | NS      |
| 1.68                     | NG0156  | conserved hypothetical protein                             |             | NS      |
| 1.68                     | NG1622c | conserved hypothetical protein                             |             | S       |
| 1.65                     | NG0319c | conserved hypothetical protein                             |             | NS      |
| 1.65                     | NG0757c | conserved hypothetical protein                             |             | S       |
| 1.64                     | NG0449  | conserved hypothetical protein                             |             | S       |
| 1.63                     | NG0472c | hypothetical protein                                       |             | NS      |
| 1.63                     | NG0510  | hypothetical protein                                       |             | NS      |
| 1.63                     | NG0787  | conserved hypothetical protein                             |             | S       |
| 1.63                     | NG1239  | conserved hypothetical protein                             |             | NS      |
| 1.62                     | NG0473c | hypothetical protein                                       |             | NS      |
| 1.62                     | NG0930  | putative additional 50S ribosomal protein                  |             | NS      |
| 1.61                     | NG0497  | hypothetical protein                                       |             | NS      |
| 1.61                     | NG0988c | putative methylated-DNA-protein-cysteine                   |             | NS      |
| 1.60                     | NG0347  | DNA polymerase III delta' subunit                          |             | NS      |
| 1.60                     | NG1004c | hypothetical protein                                       |             | NS      |
| 1.60                     | NG1117  | hypothetical protein                                       |             | NS      |
| 1.60                     | NG2065c | UDP-3-O-3-hydroxymyristoyl N-acetylglucosamine deacetylase | <i>envA</i> | NS      |
| 1.59                     | NG0849  | glutamate 5-kinase                                         | <i>proB</i> | NS      |
| 1.59                     | NG1140c | putative TspB-like protein (TspB1)                         |             | NS      |
| 1.59                     | NG1559  | conserved hypothetical protein                             |             | S       |
| 1.59                     | NG1652c | hypothetical protein                                       |             | NS      |

|      |         |                                                                      |              |    |
|------|---------|----------------------------------------------------------------------|--------------|----|
| 1.59 | NG1690c | conserved hypothetical protein                                       |              | NS |
| 1.59 | NG2092c | ferric enterobactin periplasmic binding protein                      | <i>fetB</i>  | S  |
| 1.58 | NG0217c | ABC transporter periplasmic binding protein                          | <i>fbpA</i>  | S  |
| 1.58 | NG0323c | 2-amino-4-hydroxy-6-hydroxymethylidihydropteridine-pyrophosphokinase | <i>folK</i>  | NS |
| 1.58 | NG0553  | putative TonB-dependent receptor                                     |              | S  |
| 1.58 | NG1702c | conserved hypothetical protein                                       |              | NS |
| 1.57 | NG0165c | conserved hypothetical protein                                       |              | S  |
| 1.57 | NG0468c | hypothetical protein                                                 |              | NS |
| 1.57 | NG0506  | hypothetical protein                                                 |              | NS |
| 1.57 | NG0709  | hypothetical protein                                                 |              | NS |
| 1.57 | NG0975c | nitrogen fixation protein                                            | <i>fixS</i>  | NS |
| 1.57 | NG1118  | hypothetical protein                                                 |              | NS |
| 1.57 | NG1138c | conserved hypothetical protein                                       |              | NS |
| 1.57 | NG1237  | conserved hypothetical protein                                       |              | S  |
| 1.57 | NG1381c | putative glutaredoxin 2                                              | <i>glr2</i>  | NS |
| 1.57 | NG1657c | conserved hypothetical protein                                       |              | NS |
| 1.56 | NG0475c | hypothetical protein                                                 |              | NS |
| 1.56 | NG0974c | conserved hypothetical protein                                       |              | NS |
| 1.56 | NG1066  | MafI protein (MafI1)                                                 |              | S  |
| 1.56 | NG1383c | conserved hypothetical protein                                       |              | NS |
| 1.56 | NG1656c | conserved hypothetical protein                                       |              | S  |
| 1.55 | NG0777  | DNA-binding protein Hu                                               | <i>dbhA</i>  | NS |
| 1.55 | NG0866  | serine hydroxymethyltransferase                                      | <i>glyA</i>  | NS |
| 1.55 | NG0959c | conserved hypothetical protein                                       |              | NS |
| 1.55 | NG1065  | conserved hypothetical protein                                       |              | NS |
| 1.55 | NG1300c | conserved hypothetical protein                                       |              | NS |
| 1.55 | NG1651  | conserved hypothetical protein                                       |              | NS |
| 1.54 | NG0168c | putative ABC transporter periplasmic binding                         |              | S  |
| 1.54 | NG0895c | conserved hypothetical protein                                       |              | S  |
| 1.53 | NG0009  | hypothetical protein                                                 |              | NS |
| 1.53 | NG0218c | conserved hypothetical protein                                       |              | NS |
| 1.53 | NG0466c | hypothetical protein                                                 |              | NS |
| 1.53 | NG0496  | hypothetical protein                                                 |              | S  |
| 1.53 | NG0586c | phosphatidylserine synthase                                          | <i>pssA</i>  | NS |
| 1.53 | NG1378c | transport protein                                                    | <i>exbB</i>  | NS |
| 1.53 | NG1902c | DNA-binding competence protein 4                                     | <i>comE4</i> | S  |
| 1.52 | NG0263c | amidophosphoribosyltransferase                                       | <i>purF</i>  | NS |
| 1.52 | NG1012c | hypothetical protein                                                 |              | NS |
| 1.52 | NG1471  | conserved hypothetical protein                                       |              | S  |
| 1.52 | NG1593  | hypothetical protein                                                 |              | NS |
| 1.52 | NG2166c | putative malonyl CoA-acyl carrier protein transacylase               | <i>fabD</i>  | NS |
| 1.51 | NG1496c | transferrin-binding protein B                                        | <i>tbpB</i>  | S  |
| 1.50 | NG1545c | conserved hypothetical protein                                       |              | NS |

SignalP: NS (no signal sequence detected), S (signal sequence detected)
