# Supplementary material
Source: PubMed Central journal article supplement (PMC1169496)
Supplement: jbacter_187_14_4865__2.pdf [file jbacter_187_14_4865__2.pdf]

**Supplementary Table 2. Iron-inducible open reading frames of *Neisseria gonorrhoeae* FA1090.**

| Fold Change<br>(Fe <sup>+</sup> /Fe <sup>-</sup> ) | Gene      | Product                                         | Gene        | SignalP |
|----------------------------------------------------|-----------|-------------------------------------------------|-------------|---------|
| 3.03                                               | NG1189c   | conserved hypothetical protein                  |             | NS      |
| 2.86                                               | NG0899c   | transcription elongation factor                 | <i>greA</i> | NS      |
| 2.63                                               | NG0296    | translation initiation factor IF-3              |             | NS      |
| 2.33                                               | NG0057    | putative thioredoxin                            |             | NS      |
| 2.22                                               | NG0199c   | transcription termination factor rho            | <i>rho</i>  | NS      |
| 2.22                                               | NG1833c   | 50S ribosomal subunit protein L22               |             | NS      |
| 2.22                                               | NG0775    | putative ATP-dependent protease                 | <i>lon</i>  | NS      |
| 2.13                                               | NG1776    | putative glyceraldehyde 3-phosphate             |             | NS      |
| 2.13                                               | NG1831.1c | 50S ribosomal protein L16                       | <i>rplP</i> | NS      |
| 2.13                                               | NG0172c   | tRNA (guanine-N1)-methyltransferase             |             | NS      |
| 2.13                                               | NG1836c   | 50S ribosomal protein L23                       | <i>rplW</i> | NS      |
| 2.13                                               | NG1246c   | putative serine protease                        | <i>shoB</i> | NS      |
| 2.13                                               | NG1853c   | 50S ribosomal protein L10                       | <i>rplJ</i> | NS      |
| 2.13                                               | NG18781   | conserved hypothetical protein                  |             | NS      |
| 2.08                                               | NG1844c   | 30S ribosomal protein S7                        | <i>rpsG</i> | NS      |
| 2.08                                               | NG1828c   | 50S ribosomal protein L24                       | <i>rplX</i> | NS      |
| 2.08                                               | NG1974c   | putative elongation factor TS                   | <i>tsf</i>  | NS      |
| 2.08                                               | NG1835c   | 50S ribosomal protein L2                        | <i>rplB</i> | NS      |
| 2.04                                               | NG1837c   | 50S ribosomal protein L4                        | <i>rplD</i> | NS      |
| 2.04                                               | NG1829c   | 50S ribosomal protein L14                       | <i>rplN</i> | NS      |
| 2.04                                               | NG0171c   | 50S ribosomal protein L19                       |             | NS      |
| 2.00                                               | NG1845c   | 30S ribosomal protein S12                       | <i>rpsL</i> | NS      |
| 2.00                                               | NG1834c   | 30S ribosomal protein S19                       | <i>rpsS</i> | NS      |
| 2.00                                               | NG1838c   | 50S ribosomal protein L3                        | <i>rplC</i> | NS      |
| 1.96                                               | NG0191    | 30S ribosomal protein S15                       |             | NS      |
| 1.96                                               | NG1830c   | 30S ribosomal protein S17                       | <i>rpsQ</i> | NS      |
| 1.96                                               | NG0043c   | putative ribosomal protein L11                  |             | NS      |
| 1.96                                               | NG0059    | putative flavoprotein oxidoreductase            |             | NS      |
| 1.92                                               | NG1748c   | putative NADH dehydrogenase I chain D           | <i>nuoD</i> | NS      |
| 1.92                                               | NG1832c   | 30S ribosomal subunit protein S3                |             | NS      |
| 1.92                                               | NG1826c   | 30S ribosomal protein S8                        | <i>rpsH</i> | NS      |
| 1.89                                               | NG1857c   | preprotein translocase SecE subunit             | <i>secE</i> | NS      |
| 1.89                                               | NG1975c   | 30S ribosomal protein S2                        | <i>rpsB</i> | NS      |
| 1.89                                               | NG1788    | putative glucose inhibited division protein A   |             | NS      |
| 1.89                                               | NG0295    | putative threonyl-tRNA synthetase               |             | NS      |
| 1.89                                               | NG1831c   | 50S ribosomal subunit protein L29               |             | NS      |
| 1.89                                               | NG1413    | putative Na(+)-translocating NADH-ubiquinone    |             | NS      |
| 1.85                                               | NG18261c  | 30S ribosomal protein S14                       | <i>rpsN</i> | NS      |
| 1.85                                               | NG1822c   | preprotein translocase SecY subunit             | <i>secY</i> | NS      |
| 1.82                                               | NG0376c   | putative peptidyl-prolyl cis-trans isomerase B  |             | NS      |
| 1.82                                               | NG1841c   | 30S ribosomal protein S10                       | <i>rpsJ</i> | NS      |
| 1.82                                               | NG1851c   | putative DNA-directed RNA polymerase beta chain |             | NS      |
| 1.79                                               | NG18231c  | 50S ribosomal protein L30                       | <i>rpmD</i> | NS      |
| 1.79                                               | NG1843c   | translation elongation factor G                 | <i>fusA</i> | NS      |
| 1.79                                               | NG1870c   | methionyl-tRNA formyltransferase                | <i>fnt</i>  | S       |
| 1.79                                               | NG0584    | 50S ribosomal protein L9                        |             | NS      |
| 1.79                                               | NG1827c   | 50S ribosomal protein L5                        | <i>rplE</i> | NS      |
| 1.75                                               | NG1209    | DNA cytosine methyltransferase M.NGMIII         |             | NS      |
| 1.75                                               | NG0905    | conserved hypothetical protein                  |             | NS      |
| 1.75                                               | NG1904c   | putative dosage-dependent DnaK suppressor       | <i>dnaK</i> | NS      |
| 1.75                                               | NG1937    | conserved hypothetical protein                  |             | NS      |
| 1.75                                               | NG2181c   | putative ribonuclease P protein component       |             | NS      |
| 1.75                                               | NG0173c   | 16S rRNA processing protein                     | <i>rimM</i> | NS      |
| 1.72                                               | NG0582    | putative primosomal replication protein (PriB)  | <i>priB</i> | NS      |
| 1.72                                               | NG1425c   | conserved hypothetical protein                  |             | NS      |
| 1.72                                               | NG1286    | putative translation initiation factor IF-2     |             | NS      |
| 1.72                                               | NG1825c   | 50S ribosomal protein L6 (RplF)                 | <i>rplF</i> | NS      |
| 1.72                                               | NG1859c   | putative ferredoxin                             |             | NS      |
| 1.72                                               | NG0575c   | conserved hypothetical protein                  |             | NS      |
| 1.69                                               | NG0260    | putative GTPase                                 |             | NS      |
| 1.69                                               | NG18241c  | 50S ribosomal protein L18 (RplR)                | <i>rplR</i> | NS      |
| 1.69                                               | NG0650c   | putative ATP-dependent RNA helicase             |             | NS      |
| 1.69                                               | NG2162c   | conserved hypothetical protein                  |             | NS      |
| 1.69                                               | NG0624    | putative oxidoreductase                         |             | NS      |
| 1.67                                               | NG0651    | conserved hypothetical protein                  |             | NS      |
| 1.67                                               | NG1948c   | conserved hypothetical protein                  |             | NS      |

|      |         |                                                  |             |    |
|------|---------|--------------------------------------------------|-------------|----|
| 1.67 | NG1960  | hypothetical protein                             |             | NS |
| 1.67 | NG1205  | putative TonB-dependent receptor protein         |             | S  |
| 1.64 | NG0042c | putative oligo ribonuclease                      |             | NS |
| 1.64 | NG1901c | heat shock protein/chaperone DnaJ                | <i>dnaJ</i> | NS |
| 1.64 | NG1686c | conserved hypothetical protein                   |             | S  |
| 1.64 | NG1818c | putative DNA-directed RNA polymerase alpha chain |             | NS |
| 1.64 | NG1685  | conserved hypothetical protein                   |             | NS |
| 1.64 | NG1854c | 50S ribosomal protein L1                         | <i>rplA</i> | NS |
| 1.64 | NG0297  | 50s ribosomal protein L35                        |             | NS |
| 1.64 | NG0037c | conserved hypothetical protein                   |             | NS |
| 1.61 | NG1820c | 30S ribosomal protein S11                        | <i>rpsK</i> | NS |
| 1.61 | NG1867c | putative two-component system sensor kinase      |             | S  |
| 1.61 | NG1415  | putative Na(+)-translocating NADH-ubiquinone     | <i>nqrC</i> | S  |
| 1.61 | NG1789  | putative ribonuclease HII                        | <i>rnhB</i> | NS |
| 1.61 | NG1939  | putative phosphoribosylamine--glycine ligase     |             | NS |
| 1.61 | NG0224c | putative pyrophosphohydrolase                    |             | NS |
| 1.59 | NG0459  | putative deoxyuridine 5'-triphosphate            |             | NS |
| 1.59 | NG1865c | DNA processing chain A                           | <i>dprA</i> | NS |
| 1.59 | NG1684  | conserved hypothetical protein                   |             | NS |
| 1.59 | NG1817c | 50S ribosomal protein L17                        | <i>rplQ</i> | NS |
| 1.59 | NG2126  | 50S ribosomal protein L31                        | <i>rpmE</i> | NS |
| 1.59 | NG1864c | conserved hypothetical protein                   |             | NS |
| 1.56 | NG0813c | putative biotin synthase                         |             | NS |
| 1.54 | NG1687  | conserved hypothetical protein                   |             | NS |
| 1.54 | NG1418  | putative Na(+)-translocating NADH-ubiquinone     | <i>nqrF</i> | S  |
| 1.54 | NG2180c | conserved hypothetical protein                   |             | NS |
| 1.52 | NG2174c | conserved hypothetical protein                   |             | NS |
| 1.52 | NG1850c | putative DNA-directed RNA polymerase beta' chain |             | NS |

---

Signal P: NS (no signal sequence detected), S (signal sequence detected)
