# Supplementary material
Source: PubMed Central journal article supplement (PMC1169496)
Supplement: jbacter_187_14_4865__3.pdf [file jbacter_187_14_4865__3.pdf]

**Supplementary Table 3.** Predicted operons containing iron responsive ORFs.

| Promoter Proximal ORF ‡ | Other ORFs found in predicted operon ‡ | Response to Iron Availability | Fur Box |
|-------------------------|----------------------------------------|-------------------------------|---------|
| NG008                   | <b>NG09</b>                            | Repressed                     | N       |
| <b>NG25</b>             | Monocistronic                          | Repressed                     | Y       |
| <b>NG37</b>             | Monocistronic                          | Induced                       | Y       |
| <b>NG43</b>             | <b>NG42</b>                            | Induced                       | Y       |
| <b>NG57</b>             | Monocistronic                          | Induced                       | N       |
| <b>NG59</b>             | NG60                                   | Induced                       | N       |
| <b>NG108</b>            | Monocistronic                          | Repressed                     | Y       |
| NG124                   | <b>NG125</b>                           | Repressed                     | N       |
| <b>NG142</b>            | Monocistronic                          | Repressed                     | Y       |
| <b>NG156</b>            | Monocistronic                          | Repressed                     | N       |
| NG166                   | NG162, NG163, <b>NG164, NG165</b>      | Repressed                     | Y       |
| <b>NG168</b>            | Monocistronic                          | Repressed                     | N       |
| NG174                   | <b>NG171, NG172, NG173</b>             | Induced                       | N       |
| <b>NG186</b>            | Monocistronic                          | Repressed                     | N       |
| <b>NG191</b>            | Monocistronic                          | Induced                       | N       |
| <b>NG199</b>            | Monocistronic                          | Induced                       | Y       |
| NG207                   | <b>NG208</b>                           | Repressed                     | N       |
| <b>NG217</b>            | Monocistronic                          | Repressed                     | Y       |
| <b>NG218</b>            | NG217.1                                | Repressed                     | N       |
| <b>NG224</b>            | NG223                                  | Induced                       | N       |
| NG259                   | <b>NG260</b>                           | Induced                       | N       |
| <b>NG263</b>            | Monocistronic                          | Repressed                     | N       |
| <b>NG295</b>            | <b>NG296</b>                           | Induced                       | N       |
| <b>NG297</b>            | NG298                                  | Induced                       | N       |
| <b>NG319</b>            | Monocistronic                          | Repressed                     | N       |
| <b>NG322</b>            | Monocistronic                          | Repressed                     | Y       |
| NG324                   | <b>NG323</b>                           | Repressed                     | N       |
| NG346                   | <b>NG347, NG348, NG349, NG350</b>      | Repressed                     | N       |
| <b>NG376</b>            | Monocistronic                          | Induced                       | Y       |
| <b>NG385</b>            | Monocistronic                          | Repressed                     | N       |
| NG441                   | <b>NG442</b>                           | Induced                       | N       |
| <b>NG449</b>            | Monocistronic                          | Repressed                     | Y       |
| <b>NG459</b>            | Monocistronic                          | Induced                       | N       |
| <b>NG468</b>            | <b>NG466, NG467</b>                    | Repressed                     | N       |
| <b>NG472</b>            | Monocistronic                          | Repressed                     | N       |
| <b>NG475</b>            | <b>NG473 NG474</b>                     | Repressed                     | Y       |
| <b>NG493</b>            | Monocistronic                          | Repressed                     | N       |
| <b>NG494</b>            | <b>NG495, NG496</b>                    | Repressed                     | N       |
| <b>NG497</b>            | Monocistronic                          | Repressed                     | N       |
| <b>NG498</b>            | NG499, NG500                           | Repressed                     | N       |
| NG501                   | <b>NG502, NG503</b>                    | Repressed                     | N       |
| NG504                   | NG505, <b>NG506, NG507, NG508</b>      | Repressed                     | N       |
| <b>NG510</b>            | Monocistronic                          | Repressed                     | Y       |
| <b>NG522</b>            | Monocistronic                          | Repressed                     | N       |
| <b>NG553</b>            | Monocistronic                          | Repressed                     | Y       |
| <b>NG554</b>            | Monocistronic                          | Repressed                     | Y       |
| <b>NG574</b>            | Monocistronic                          | Repressed                     | Y       |
| <b>NG575</b>            | Monocistronic                          | Induced                       | Y       |
| NG581                   | <b>NG582, NG583, NG584</b>             | Induced                       | N       |
| NG587                   | NG585, <b>NG586</b>                    | Repressed                     | N       |
| <b>NG600</b>            | Monocistronic                          | Repressed                     | N       |
| <b>NG602</b>            | Monocistronic                          | Repressed                     | N       |
| <b>NG624</b>            | Monocistronic                          | Induced                       | N       |
| <b>NG650</b>            | Monocistronic                          | Induced                       | N       |
| <b>NG651</b>            | Monocistronic                          | Induced                       | N       |
| <b>NG656</b>            | Monocistronic                          | Repressed                     | Y       |
| <b>NG709</b>            | Monocistronic                          | Repressed                     | N       |
| <b>NG713</b>            | Monocistronic                          | Repressed                     | N       |
| NG728                   | <b>NG727</b>                           | Repressed                     | N       |
| <b>NG754</b>            | Monocistronic                          | Repressed                     | N       |
| <b>NG757</b>            | Monocistronic                          | Repressed                     | N       |
| <b>NG775</b>            | Monocistronic                          | Induced                       | Y       |
| <b>NG777</b>            | Monocistronic                          | Repressed                     | N       |
| <b>NG787</b>            | <b>NG788</b>                           | Repressed                     | N       |
| <b>NG813</b>            | Monocistronic                          | Induced                       | N       |
| <b>NG849</b>            | NG850                                  | Repressed                     | Y       |

|        |                                                                                                                                                                                                                                                         |           |   |
|--------|---------------------------------------------------------------------------------------------------------------------------------------------------------------------------------------------------------------------------------------------------------|-----------|---|
| NG863  | Monocistronic                                                                                                                                                                                                                                           | Repressed | Y |
| NG865  | <b>NG866</b>                                                                                                                                                                                                                                            | Repressed | N |
| NG867  | Monocistronic                                                                                                                                                                                                                                           | Repressed | Y |
| NG887  | Monocistronic                                                                                                                                                                                                                                           | Repressed | Y |
| NG895  | Monocistronic                                                                                                                                                                                                                                           | Repressed | Y |
| NG899  | Monocistronic                                                                                                                                                                                                                                           | Induced   | N |
| NG904  | <b>NG905</b> , NG906                                                                                                                                                                                                                                    | Induced   | N |
| NG911  | Monocistronic                                                                                                                                                                                                                                           | Repressed | N |
| NG930  | <b>NG931</b>                                                                                                                                                                                                                                            | Repressed | Y |
| NG959  | Monocistronic                                                                                                                                                                                                                                           | Repressed | N |
| NG976  | <b>NG974</b> , <b>NG975</b>                                                                                                                                                                                                                             | Repressed | N |
| NG988  | Monocistronic                                                                                                                                                                                                                                           | Repressed | N |
| NG1003 | NG1001, <b>NG1002</b>                                                                                                                                                                                                                                   | Repressed | N |
| NG1012 | NG1011                                                                                                                                                                                                                                                  | Repressed | N |
| NG1013 | Monocistronic                                                                                                                                                                                                                                           | Repressed | Y |
| NG1063 | Monocistronic                                                                                                                                                                                                                                           | Repressed | Y |
| NG1064 | <b>NG1065</b>                                                                                                                                                                                                                                           | Repressed | N |
| NG1066 | Monocistronic                                                                                                                                                                                                                                           | Repressed | Y |
| NG1085 | Monocistronic                                                                                                                                                                                                                                           | Repressed | N |
| NG1094 | NG1092, <b>NG1093</b>                                                                                                                                                                                                                                   | Repressed | N |
| NG1117 | <b>NG1118</b>                                                                                                                                                                                                                                           | Repressed | N |
| NG1113 | <b>NG1134</b>                                                                                                                                                                                                                                           | Induced   | N |
| NG1141 | <b>NG1138</b> , <b>NG1139</b> , <b>NG1140</b>                                                                                                                                                                                                           | Repressed | N |
| NG1175 | <b>NG1173</b> , <b>NG1174</b>                                                                                                                                                                                                                           | Repressed | N |
| NG1177 | Monocistronic                                                                                                                                                                                                                                           | Repressed | N |
| NG1189 | Monocistronic                                                                                                                                                                                                                                           | Induced   | N |
| NG1205 | Monocistronic                                                                                                                                                                                                                                           | Induced   | N |
| NG1207 | NG1208, <b>NG1209</b>                                                                                                                                                                                                                                   | Induced   | Y |
| NG1237 | Monocistronic                                                                                                                                                                                                                                           | Repressed | N |
| NG1239 | NG12409, NG1241                                                                                                                                                                                                                                         | Repressed | N |
| NG1246 | Monocistronic                                                                                                                                                                                                                                           | Induced   | N |
| NG1284 | NG1285, <b>NG1286</b>                                                                                                                                                                                                                                   | Induced   | N |
| NG1300 | Monocistronic                                                                                                                                                                                                                                           | Repressed | N |
| NG1318 | Monocistronic                                                                                                                                                                                                                                           | Repressed | Y |
| NG1358 | Monocistronic                                                                                                                                                                                                                                           | Repressed | Y |
| NG1379 | NG1377, <b>NG1378</b>                                                                                                                                                                                                                                   | Repressed | N |
| NG1381 | Monocistronic                                                                                                                                                                                                                                           | Repressed | N |
| NG1384 | <b>NG1383</b>                                                                                                                                                                                                                                           | Repressed | N |
| NG1391 | Monocistronic                                                                                                                                                                                                                                           | Repressed | N |
| NG1413 | NG1414, <b>NG1415</b> , NG1416, NG1417, <b>NG1418</b>                                                                                                                                                                                                   | Induced   | N |
| NG1425 | Monocistronic                                                                                                                                                                                                                                           | Induced   | Y |
| NG1442 | Monocistronic                                                                                                                                                                                                                                           | Repressed | Y |
| NG1470 | <b>NG1471</b> , NG1472                                                                                                                                                                                                                                  | Repressed | Y |
| NG1496 | <b>NG1495</b>                                                                                                                                                                                                                                           | Repressed | Y |
| NG1545 | NG1543, NG1544                                                                                                                                                                                                                                          | Repressed | N |
| NG1559 | Monocistronic                                                                                                                                                                                                                                           | Repressed | N |
| NG1586 | Monocistronic                                                                                                                                                                                                                                           | Repressed | N |
| NG1588 | Monocistronic                                                                                                                                                                                                                                           | Repressed | N |
| NG1593 | Monocistronic                                                                                                                                                                                                                                           | Repressed | N |
| NG1622 | NG1621                                                                                                                                                                                                                                                  | Repressed | N |
| NG1651 | Monocistronic                                                                                                                                                                                                                                           | Repressed | N |
| NG1652 | Monocistronic                                                                                                                                                                                                                                           | Repressed | N |
| NG1659 | <b>NG1656</b> , <b>NG1657</b> , NG1658                                                                                                                                                                                                                  | Repressed | Y |
| NG1684 | Monocistronic                                                                                                                                                                                                                                           | Induced   | N |
| NG1685 | Monocistronic                                                                                                                                                                                                                                           | Induced   | Y |
| NG1686 | Monocistronic                                                                                                                                                                                                                                           | Induced   | N |
| NG1687 | Monocistronic                                                                                                                                                                                                                                           | Induced   | N |
| NG1690 | Monocistronic                                                                                                                                                                                                                                           | Repressed | N |
| NG1702 | Monocistronic                                                                                                                                                                                                                                           | Repressed | N |
| NG1718 | NG1719, NG1720, NG1721                                                                                                                                                                                                                                  | Repressed | N |
| NG1751 | NG1747, <b>NG1748</b> , NG1749, NG1750                                                                                                                                                                                                                  | Induced   | Y |
| NG1776 | Monocistronic                                                                                                                                                                                                                                           | Induced   | N |
| NG1788 | Monocistronic                                                                                                                                                                                                                                           | Induced   | Y |
| NG1789 | Monocistronic                                                                                                                                                                                                                                           | Induced   | Y |
| NG1829 | <b>NG1817</b> , <b>NG1818</b> , NG1819, <b>NG1820</b> , NG1821, NG1821.0, NG1821.1, <b>NG1822</b> , NG1823, <b>NG1823.1</b> , NG1824, <b>NG1824.1</b> , <b>NG1825</b> , <b>NG1826</b> , <b>NG1826.1</b> , <b>NG1827</b> , <b>NG1828</b> , <b>NG1829</b> | Induced   | N |
| NG1838 | <b>NG1830</b> , <b>NG1831</b> , <b>NG1831.1</b> , <b>NG1832</b> , <b>NG1833</b> , <b>NG1834</b> , <b>NG1835</b> , <b>NG1836</b> , <b>NG1837</b> , <b>NG1838</b>                                                                                         | Induced   | N |
| NG1842 | <b>NG1841</b>                                                                                                                                                                                                                                           | Induced   | Y |
| NG1845 | <b>NG1843</b> , <b>NG1844</b>                                                                                                                                                                                                                           | Induced   | N |

|          |                                        |           |   |
|----------|----------------------------------------|-----------|---|
| NG1850   | Monocistronic                          | Induced   | Y |
| NG1851   | Monocistronic                          | Induced   | Y |
| NG1853   | NG1852                                 | Induced   | N |
| NG1855   | NG1854                                 | Induced   | N |
| NG1857   | NG1856                                 | Induced   | N |
| NG1859   | Monocistronic                          | Induced   | N |
| NG1865   | NG1864                                 | Induced   | Y |
| NG1871   | NG1866, NG1867, NG1868, NG1869, NG1870 | Induced   | N |
| NG1878.1 | NG1879                                 | Induced   | N |
| NG1884   | Monocistronic                          | Induced   | N |
| NG1901   | Monocistronic                          | Induced   | N |
| NG1902   | Monocistronic                          | Repressed | N |
| NG1904   | Monocistronic                          | Induced   | N |
| NG1937   | Monocistronic                          | Induced   | Y |
| NG1939   | NG1940, NG1941                         | Induced   | N |
| NG1948   | NG1947                                 | Induced   | N |
| NG1960   | Monocistronic                          | Induced   | Y |
| NG1974   | Monocistronic                          | Induced   | N |
| NG1975   | Monocistronic                          | Induced   | N |
| NG2065   | Monocistronic                          | Repressed | N |
| NG2092   | Monocistronic                          | Repressed | Y |
| NG2093   | Monocistronic                          | Repressed | Y |
| NG2114   | Monocistronic                          | Repressed | N |
| NG2115   | Monocistronic                          | Repressed | Y |
| NG2126   | Monocistronic                          | Induced   | N |
| NG2162   | Monocistronic                          | Induced   | Y |
| NG2166   | Monocistronic                          | Repressed | N |
| NG2174   | NG2173                                 | Induced   | N |
| NG2182   | NG2180, NG2181                         | Induced   | N |

‡ ORFs listed in Supplementary Table 1 and Supplementary Table 2 are in blue.
